# Supplementary material for: Comparison of a Novel Formulation of Abiraterone Acetate vs. the Originator Formulation in Healthy Male Subjects: Two Randomized, Open-Label, Crossover Studies
Source: PubMed Central journal article supplement — Clin Pharmacokinet. 2017 Apr 19;56(7):803–13. doi: 10.1007/s40262-017-0536-2 (PMC5488144; doi:10.1007/s40262-017-0536-2), 2017-04-19
Supplement: 40262_2017_536_MOESM1_ESM.pdf [file 40262_2017_536_MOESM1_ESM.pdf]

## ELECTRONIC SUPPLEMENTARY MATERIAL

**Title:** Comparison of a Novel Formulation of Abiraterone Acetate Versus the Originator Formulation in Healthy Male Subjects : Two Randomized, Open-Label, Crossover Studies

**Journal:** *Clinical Pharmacokinetics*

**Authors:** Ronald Goldwater, Azra Hussaini, Bill Bosch, and Paul Nemeth

**Email address of corresponding author:** [PNemeth@churchillpharma.com](mailto:PNemeth@churchillpharma.com)

**Caption :**  
**Study 101 Bioequivalence Analysis of Dose Proportionality for AAFP**

**Online Resource 1.** Bioequivalence analysis of dose proportionality for AAFP 100 mg and 400 mg after dose normalization to 200 mg.

| PK Paramet         | Average (raw) |             |           | ANOVA Model-Based Least-Square Mean (log scale) |             |                |                  |                      |                   |
|--------------------|---------------|-------------|-----------|-------------------------------------------------|-------------|----------------|------------------|----------------------|-------------------|
|                    | AAFP 100 mg   | AAFP 200 mg | Ratio (%) | AAFP 100 mg                                     | AAFP 200 mg | Mean Differenc | (90% CI)         | Geometric Mean Ratio | (90% CI of Ratio) |
| AUC <sub>0-∞</sub> | 150.731       | 183.348     | 82.5      | 4.866                                           | 5.091       | -0.225         | (-0.370, -0.080) | 0.799                | (0.691 – 0.923)   |
| AUC <sub>0-t</sub> | 136.876       | 169.801     | 81        | 4.76                                            | 5.004       | -0.244         | (-0.397, -0.091) | 0.783                | (0.673 – 0.913)   |
| C <sub>max</sub>   | 35.265        | 39.07       | 101.5     | 3.377                                           | 3.471       | -0.094         | (-0.318, 0.130)  | 0.910                | (0.727 – 1.139)   |

  

| PK Paramet         | Average (raw) |             |           | ANOVA Model-Based Least-Square Mean (log scale) |             |                |                 |                      |                   |
|--------------------|---------------|-------------|-----------|-------------------------------------------------|-------------|----------------|-----------------|----------------------|-------------------|
|                    | AAFP 400 mg   | AAFP 200 mg | Ratio (%) | AAFP 400 mg                                     | AAFP 200 mg | Mean Differenc | (90% CI)        | Geometric Mean Ratio | (90% CI of Ratio) |
| AUC <sub>0-∞</sub> | 165.276       | 183.344     | 95        | 5.034                                           | 5.091       | -0.057         | (-0.198, 0.084) | 0.945                | (0.821 – 1.087)*  |
| AUC <sub>0-t</sub> | 156.727       | 169.988     | 98.1      | 4.969                                           | 5.004       | -0.035         | (-0.183, 0.113) | 0.966                | (0.832 – 1.120)*  |
| C <sub>max</sub>   | 34.158        | 39.106      | 98.4      | 3.399                                           | 3.471       | -0.072         | (-0.290, 0.146) | 0.931                | (0.748 – 1.157)   |

| PK Parameters      | Statistics           | Power Model: P = a × Dose <sup>b</sup> |         |
|--------------------|----------------------|----------------------------------------|---------|
|                    |                      | A                                      | B       |
| AUC <sub>0-∞</sub> | Parameter Estimates  | 0.4596                                 | 1.087   |
|                    | 95% CI - Lower Limit | 0.1325                                 | 0.8537  |
|                    | 95% CI - Upper Limit | 1.5935                                 | 1.3203  |
|                    | p value              | 0.2154                                 | <0.0001 |
| AUC <sub>0-t</sub> | Parameter Estimates  | 0.3540                                 | 1.1202  |
|                    | 95% CI - Lower Limit | 0.0970                                 | 0.8772  |
|                    | 95% CI - Upper Limit | 1.2923                                 | 1.3632  |
|                    | p value              | 0.1137                                 | <0.0001 |

|                  |                      |        |         |
|------------------|----------------------|--------|---------|
| C <sub>max</sub> | Parameter Estimates  | 0.1802 | 0.9670  |
|                  | 95% CI - Lower Limit | 0.0415 | 0.6913  |
|                  | 95% CI - Upper Limit | 0.7831 | 1.2427  |
|                  | <i>p</i> value       | 0.0231 | <0.0001 |

AAFP, abiraterone acetate fine particle; AUC<sub>0-∞</sub>, area under the plasma concentration–time curve from time 0 extrapolated to infinite time; AUC<sub>0-t</sub>, area under the plasma concentration–time curve from time 0 to the time of the last quantifiable concentration; C<sub>max</sub>, maximum concentration; CI, confidence interval.

\* The 90% CI fell within the recommended 0.800–1.250 limits of bioequivalence when analyzed on log.
